# Supplementary material for: Impact of Seasonal Variation and Processing Methods on the Cassava-Derived Dietary Cyanide Poisoning, Nutritional Status, and Konzo Appearance in South-Kivu, Eastern D.R. Congo
Source: MDPI journal article supplement (doi:10.3390/pr10020337), 2022-02-10
Supplement: s1 [file s1]

**Supplementary material: Table S1.** Comparison between final study population and excluded participants

| Characteristics                                                     | General group<br>(n=94) | Final study population<br>(n=54) | Excluded participants<br>(n=40) | p      |
|---------------------------------------------------------------------|-------------------------|----------------------------------|---------------------------------|--------|
| Age                                                                 | 28.8 (12.0)             | 28.6 (12.1)                      | 29.1 (12.0)                     | 0.8599 |
| Sex                                                                 |                         |                                  |                                 |        |
| Female                                                              | 56 (59.6)               | 34 (63.0)                        | 22 (55.0)                       | 0.4367 |
| Male                                                                | 38 (40.4)               | 20 (37.0)                        | 18 (45.0)                       |        |
| Level of completed education                                        |                         |                                  |                                 |        |
| No education                                                        | 62 (66.0)               | 37 (68.5)                        | 25 (62.5)                       | 0.4496 |
| Primary                                                             | 25 (26.6)               | 12 (22.2)                        | 13 (32.5)                       |        |
| Secondary                                                           | 7 (7.5)                 | 5 (9.3)                          | 2 (5.0)                         |        |
| Occupation                                                          |                         |                                  |                                 |        |
| Farmer                                                              | 61 (64.9)               | 37 (68.5)                        | 24 (60.0)                       | 0.3922 |
| Other                                                               | 33 (35.1)               | 17 (31.5)                        | 16 (40.0)                       |        |
| Growing cassava                                                     |                         |                                  |                                 |        |
| Yes                                                                 | 92 (97.9)               | 54 (100.0)                       | 38 (95.0)                       | 0.1784 |
| No                                                                  | 2 (2.1)                 | 0 (0.0)                          | 2 (5.0)                         |        |
| Eating raw cassava                                                  |                         |                                  |                                 |        |
| Yes                                                                 | 73 (77.7)               | 45 (83.3)                        | 28 (70.0)                       | 0.1249 |
| No                                                                  | 21 (22.3)               | 9 (16.7)                         | 12 (30.0)                       |        |
| Frequent consumption of cassava (at least 2 out of the last 3 days) |                         |                                  |                                 |        |
| Yes                                                                 | 79 (84.0)               | 43 (79.6)                        | 36 (90.0)                       | 0.1746 |
| No                                                                  | 15 (16.0)               | 11 (20.4)                        | 4 (10.0)                        |        |
| Taste of most consumed cassava                                      |                         |                                  |                                 |        |
| Bitter                                                              | 36 (40.0)               | 19 (35.2)                        | 17 (47.2)                       | 0.2534 |
| Either sweet or a mixture of both                                   | 54 (60.0)               | 35 (64.8)                        | 19 (52.8)                       |        |
| Cassava processing practices                                        |                         |                                  |                                 |        |
| Heap-fermentation (days)                                            | 2.0 (1.0-3.0)           | 2.0 (1.0-3.0)                    | 2.0 (2.0-3.0)                   | 0.1311 |
| Sun-drying (days)                                                   | 3.0 (2.0-6.0)           | 3.0 (2.0-6.0)                    | 2.0 (2.0-5.0)                   | 0.1094 |
| Total duration (days)                                               | 5.0 (3.0-7.0)           | 6.0 (3.0-7.0)                    | 4.5 (3.0-7.0)                   | 0.4292 |
| Biological parameters                                               |                         |                                  |                                 |        |
| Urinary thiocyanate (μmol/L)                                        | 172.0 (68.8-172.0)      | 172.0 (68.8-344.0)               | 103.2 (68.8-172.0)              | 0.1469 |
| Serum protein levels (g/dL)                                         | 8.2 (8.0-8.5)           | 8.2 (7.9-8.4)                    | 8.3 (8.0-8.6)                   | 0.2843 |
| Albumin levels (g/dL)                                               | 4.6 (4.4-4.9)           | 4.6 (4.4-4.9)                    | 4.6 (4.3-4.9)                   | 0.9968 |
